# Supplementary material
Source: Springer Nature journal article supplement (https://www.springermedizin.de/resource/supplementary/12943_2003_46_MOESM12_ESM.pdf/9553318)

Control  
TGFB-1

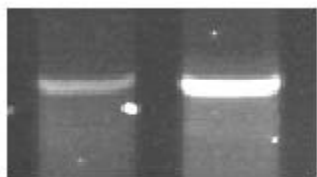

← p8

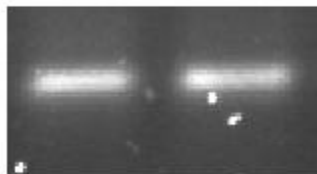

← RL3

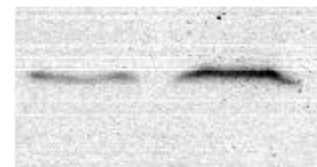

← p8

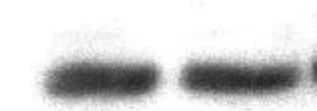

←  $\beta$ -tubulin

Panc-1

Supplement: MOESM12 [file 9553318]
